# Supplementary figures and images for: Non-Woven Sheet Containing Gemcitabine: Controlled Release Complex for Pancreatic Cancer Treatment
Source: MDPI journal article supplement (doi:10.3390/polym14010168), 2022-01-01

Figure S1

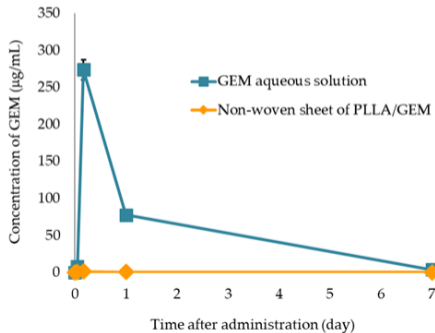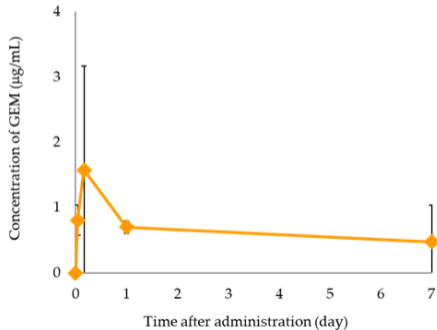

Supplement: s1 [file s1]
